# Supplementary material for: Genetic recombination of poly(l-lysine) functionalized apoferritin nanocages that resemble viral capsid nanometer-sized platforms for gene therapy
Source: Royal Society of Chemistry journal article supplement (doi:10.1039/c9bm01822k), 2020-01-01
Supplement: c9bm01822k1.pdf [file c9bm01822k1.pdf]

# **Genetic Recombination Poly(L-lysine) Functionalized Apoferritin Nanocages as Resembled Viral Capsid Nanometer-Sized Platforms for Gene Therapy**

Haiqin Huang, Shirui Yuan, Zhuo Ma, Peng Ji, Xiaonan Ma, Zhenghong Wu\* Xiaole Qi\*

Key Laboratory of Modern Chinese Medicines, China Pharmaceutical University,  
Nanjing 210009, P. R. China

\* Correspondence: zhenghongwu66@cpu.edu.cn (Z.H.W), Tel: +86-150-6220-8341;  
qixiaole523@cpu.edu.cn (X.L.Q), Tel: +86-159-9622-9832

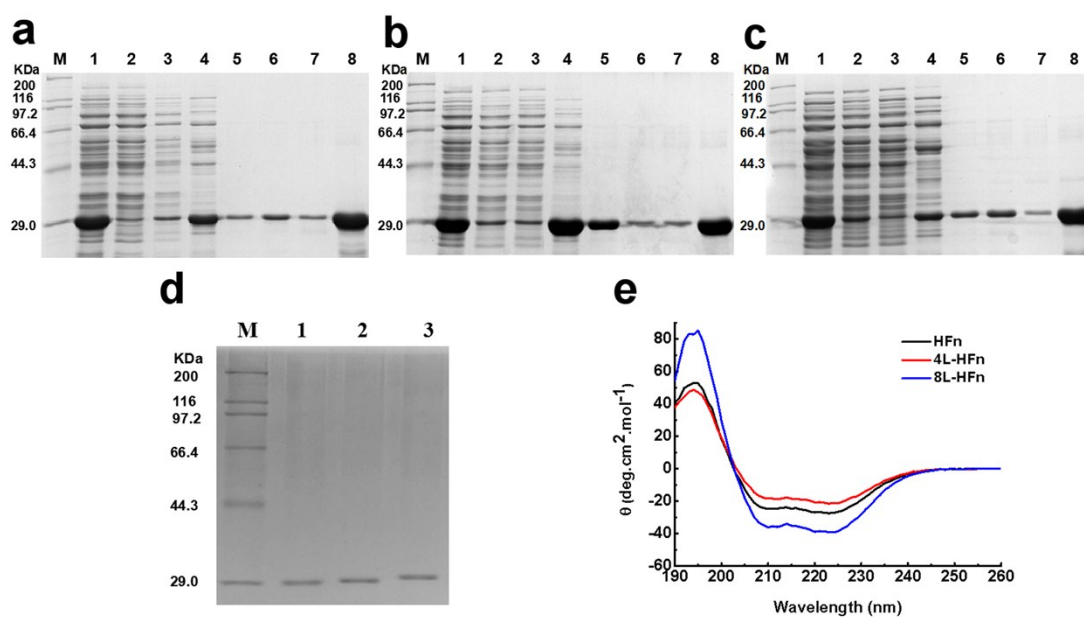

**Figure S1.** Characterization of HFn and 4L-HFn. The purification of HFn (a), 4L-HFn (b), and 8L-HFn (c) were analyzed by 12 % SDS-PAGE. Lane M: Protein marker; Lane 1: supernatant after heat; Lane 2: sample effluent; Lane 3: effluent washed by binding buffer; Lane 4-8: protein gradient eluted by 30 mM, 50 mM, 70 mM, 90 mM, and 300 mM imidazole, successively. (d) SDS-PAGE results of HFn, 4L-HFn, and 8L-HFn on 12 % resolving gel. (e) CD spectra results of HFn, 4L-HFn, and 8L-HFn nanocages.

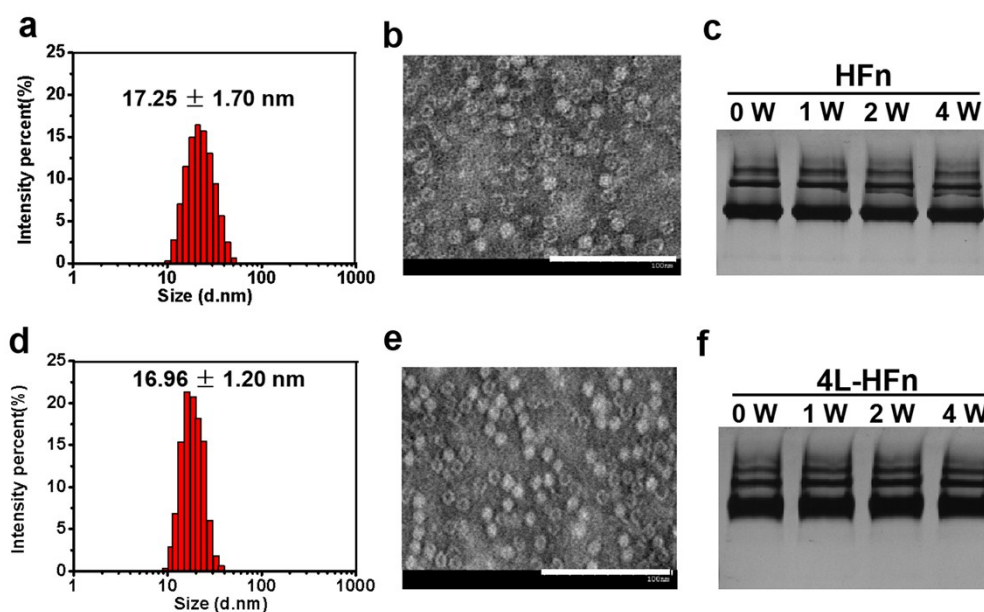

**Figure S2.** Particle size distribution of HFn (a) and 4L-HFn (d) in pH 8.0 buffer (20 mM Tris, 0.15 M NaCl). Morphological observed by TEM of HFn (b) and 4L-HFn (e) in pH 8.0 buffer (20 mM Tris, 0.15 M NaCl). The stability of HFn (c) and 4L-HFn (f) stored at 4 °C for 4 weeks detected by Native PAGE.

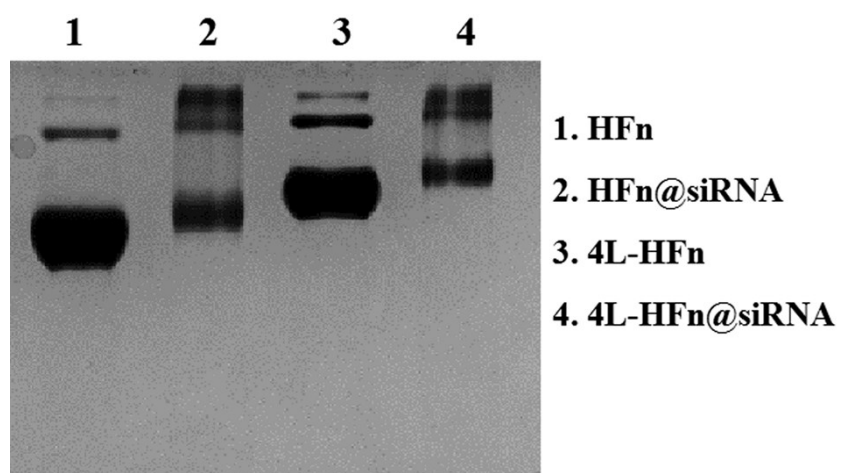

**Figure S3.** Characterization of the reassembly protein cage of HFn@siRNA and 4L-HFn@siRNA nanoparticles detected by 6% non-continuous native gel electrophoresis.

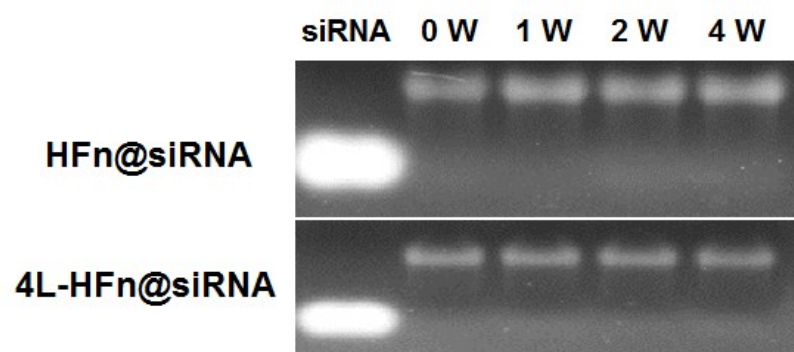

**Figure S4.** Stability of HFn@siRNA (1:8) and 4L-HFn@siRNA (1:8) nanoparticles stored at 4 °C for 4 weeks, detected by 2% agarose gel electrophoresis.

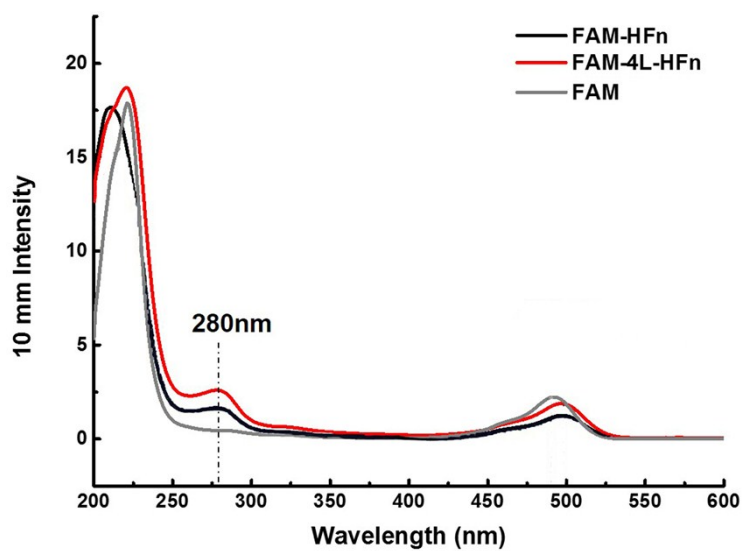

**Figure S5.** UV vis absorption spectra of FAM-HFn, FAM-4L-HFn and FAM. Except for 280 nm, FAM-4L-HFn exhibited the absorption peak of FAM at 495 nm, indicating the successful conjugation of FAM to HFn and 4L-HFn.

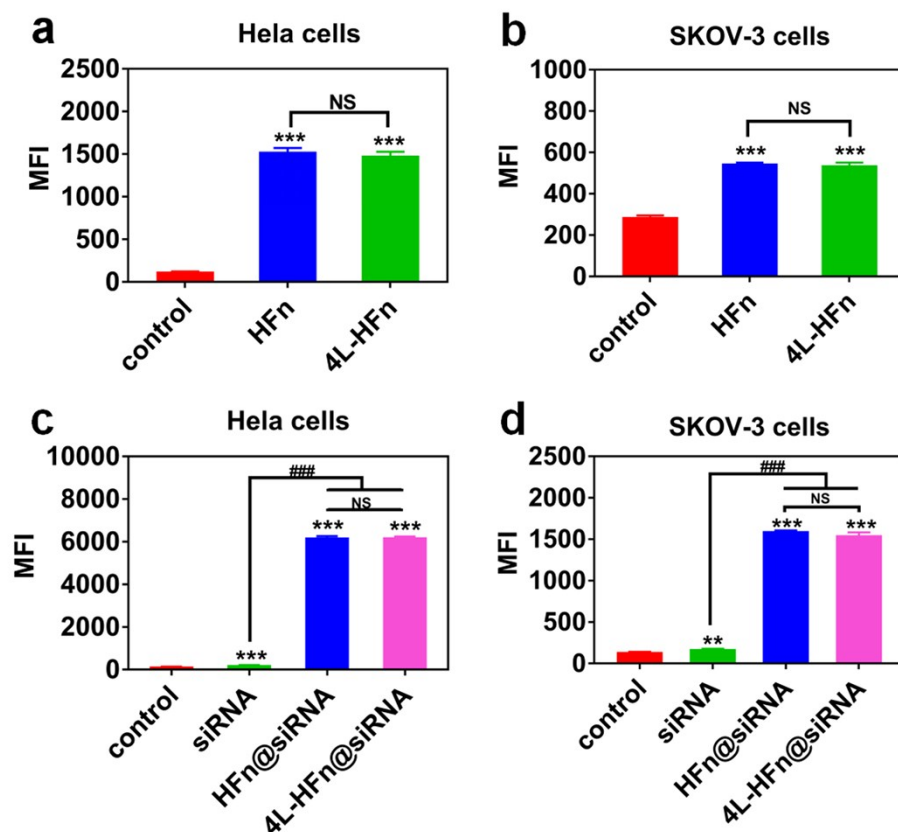

**Figure S6.** Cellular uptake studies of Hela and SKOV-3 cells incubated with nL-HFn and nL-HFn@siRNA nanoparticles by flow cytometry. The result analysis of average fluorescence intensity (MFI) according to Figure 5d, e, g, and h. Data represent mean  $\pm$  SD ( $n = 3$ ). The significance of the differences (\*\*  $p < 0.01$ , \*\*\*  $p < 0.001$  vs control group, ###  $p < 0.001$  vs siRNA group) was evaluated by the Student's  $t$ -test.

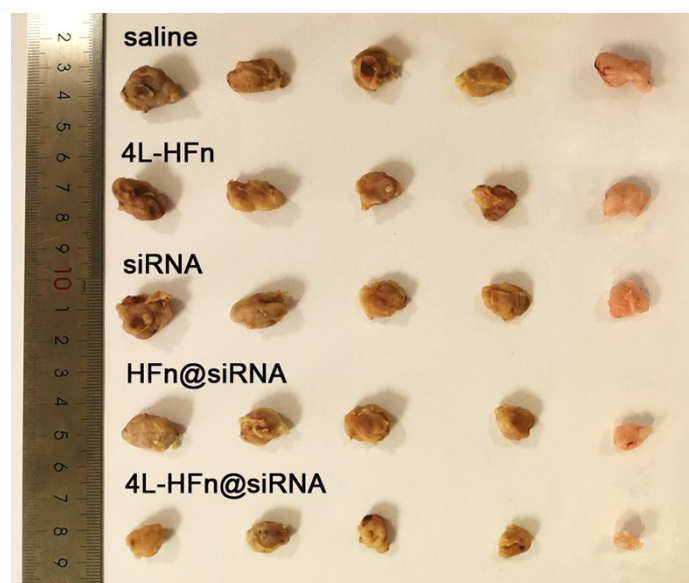

**Figure S7.** Photographs of tumors in different groups with saline, 4L-HFn, siRNA, HFn@siRNA and 4L-HFn@siRNA after last injection treatment ( $n = 5$ ).
